# Supplementary material for: Prospective Study of Glycated Hemoglobin and Trajectories of Depressive Symptoms: The China Health and Retirement Longitudinal Study
Source: PubMed Central journal article supplement (PMC6457062; doi:10.14336/ad.2018.0410), 2019-04-01
Supplement: ad-10-2-249-s.pdf [file ad-10-2-249-s.pdf]

## **Prospective Study of Glycated Hemoglobin and Trajectories of Depressive Symptoms: The China Health and Retirement Longitudinal Study**

**Haibin Li<sup>1,2</sup>, Anxin Wang<sup>1,2</sup>, Wei Feng<sup>1,2</sup>, Deqiang Zheng<sup>1,2</sup>, Qi Gao<sup>1,2</sup>, Lixin Tao<sup>1,2</sup>, Jin Guo<sup>3</sup>, Xiaonan Wang<sup>1,2</sup>, Xia Li<sup>4</sup>, Wei Wang<sup>5</sup>, Xiuhua Guo<sup>1,2\*</sup>**

<sup>1</sup>Department of Epidemiology and Health Statistics, School of Public Health, Capital Medical University, Beijing, China. <sup>2</sup>Beijing Municipal Key Laboratory of Clinical Epidemiology, Capital Medical University, Beijing, China. <sup>3</sup>Greenwood Medical Company, 300 Highway Burwood, Melbourne, Melbourne, Victoria, Australia. <sup>4</sup>Department of Mathematics and Statistics, La Trobe University, Victoria, Australia. <sup>5</sup>Global Health and Genomics, School of Medical Sciences and Health, Edith Cowan University, Perth, Western Australia, Australia.

# SUPPLEMENTARY DATA

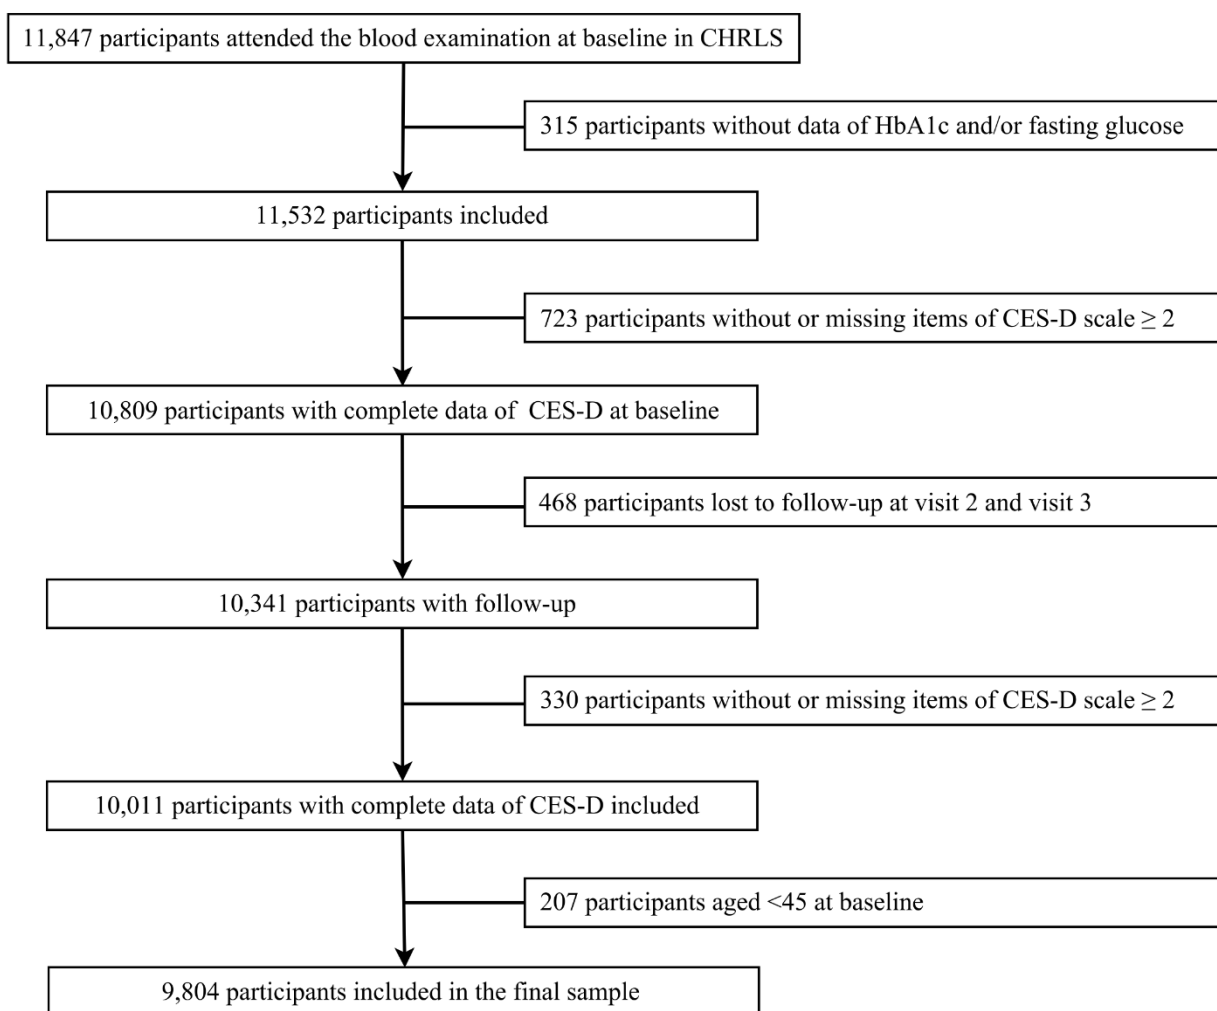

**Supplementary Figure 1. Flowchart of Study Profile.**

# SUPPLEMENTARY DATA

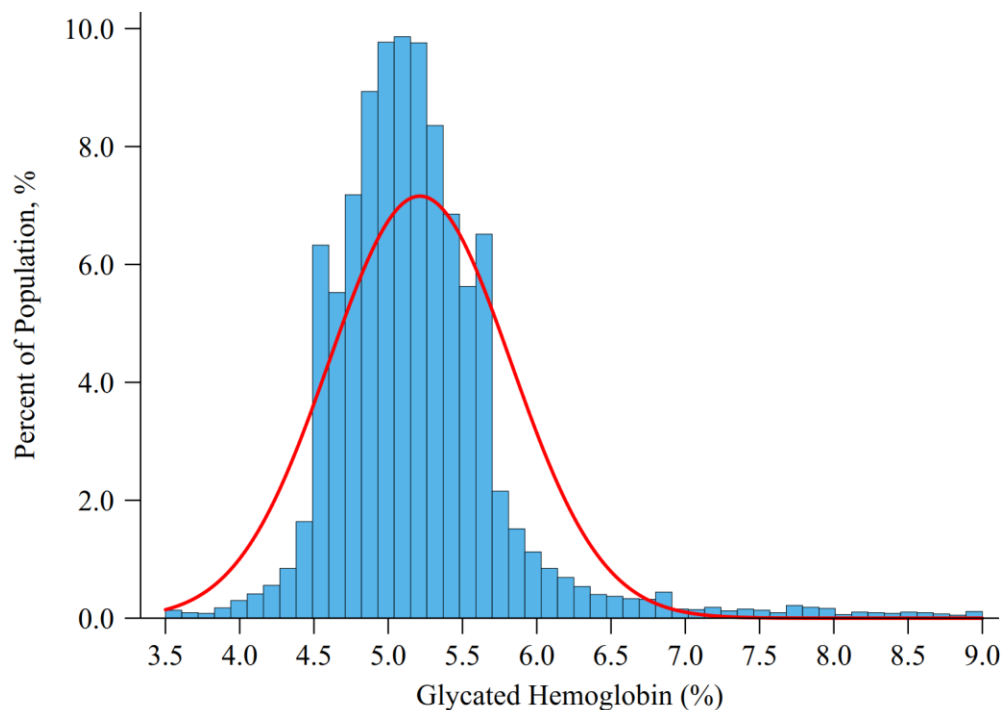

**Supplementary Figure 2. Histogram of Serum glycated hemoglobin Concentrations. Red Solid curve denotes the normality plot.**

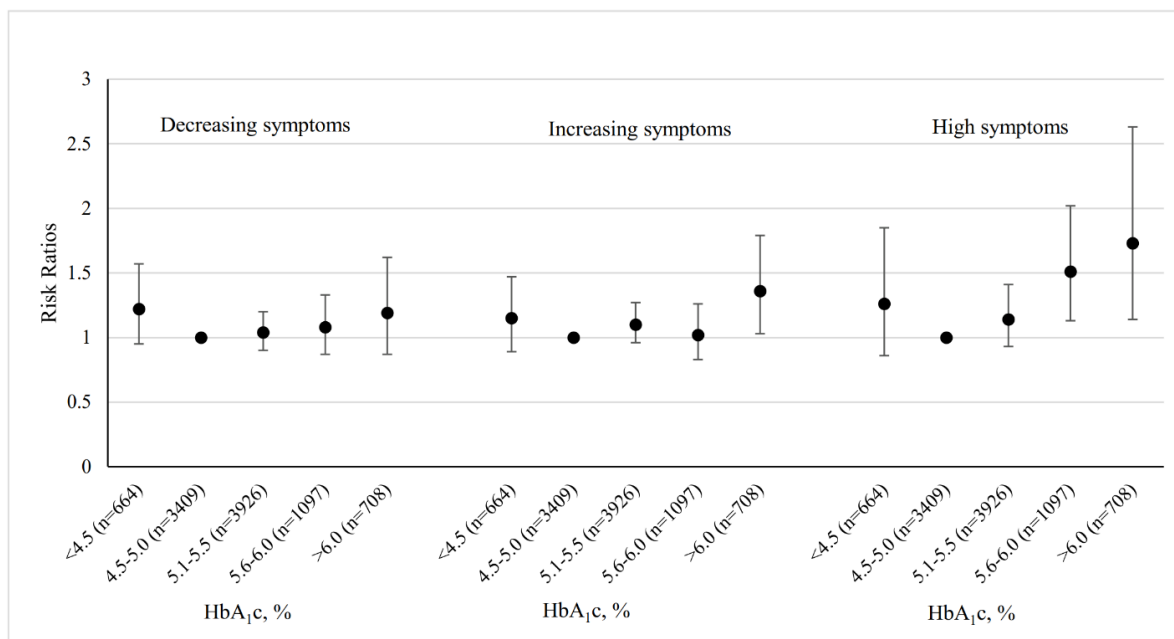

**Supplementary Figure 3. The risk ratios of decreasing, increasing and high depressive symptoms by using an alternative HbA<sub>1c</sub> category (<4.5%, 4.5-5.0%, 5.1-5.5%, 5.6-6.0%, and >6.0%).**

# SUPPLEMENTARY DATA

**Supplementary Table 1.** Sensitivity Analyses for the Association Between Quintile of Glycated Hemoglobin (HbA<sub>1c</sub>) and Risk of Trajectories of Depressive Symptoms\*

|                                                                                    | Low symptoms     | Decreasing symptoms | Increasing symptoms | High symptoms    |
|------------------------------------------------------------------------------------|------------------|---------------------|---------------------|------------------|
| Excluding participants who had antidepressant use (n=63) ¶                         |                  |                     |                     |                  |
| Quintile 1                                                                         | 1.00 (Reference) | 1.00 (Reference)    | 1.00 (Reference)    | 1.00 (Reference) |
| Quintile 2                                                                         | 0.88 (0.73-1.07) | 1.05 (0.87-1.27)    | 0.86 (0.64-1.15)    | 1.12 (0.85-1.47) |
| Quintile 3                                                                         | 0.89 (0.73-1.07) | 1.20 (1.01-1.44)    | 0.93 (0.71-1.22)    | 1.38 (1.03-1.85) |
| Quintile 4                                                                         | 1.01 (0.84-1.22) | 1.12 (0.92-1.37)    |                     |                  |
| Quintile 5                                                                         |                  |                     |                     |                  |
| Excluding participants who had treatments for diabetes (n=394) †                   |                  |                     |                     |                  |
| Quintile 1                                                                         | 1.00 (Reference) | 1.00 (Reference)    | 1.00 (Reference)    | 1.00 (Reference) |
| Quintile 2                                                                         | 0.88 (0.73-1.08) | 1.07 (0.89-1.29)    | 0.86 (0.64-1.16)    | 1.15 (0.87-1.51) |
| Quintile 3                                                                         | 1.03 (0.86-1.24) | 1.23 (1.03-1.47)    | 0.96 (0.73-1.27)    | 1.44 (1.07-1.94) |
| Quintile 4                                                                         | 0.89 (0.74-1.08) | 1.11 (0.91-1.37)    |                     |                  |
| Quintile 5                                                                         | 1.08 (0.88-1.34) |                     |                     |                  |
| Excluding participants who had treatments for depression and/or diabetes (n=453) ‡ |                  |                     |                     |                  |
| Quintile 1                                                                         | 1.00 (Reference) | 1.00 (Reference)    | 1.00 (Reference)    | 1.00 (Reference) |
| Quintile 2                                                                         | 0.88 (0.72-1.07) | 1.07 (0.89-1.29)    | 0.88 (0.65-1.18)    | 1.16 (0.88-1.53) |
| Quintile 3                                                                         | 1.02 (0.85-1.23) | 1.23 (1.02-1.47)    | 0.94 (0.71-1.25)    | 1.43 (1.06-1.93) |
| Quintile 4                                                                         | 0.89 (0.74-1.08) | 1.12 (0.92-1.38)    |                     |                  |
| Quintile 5                                                                         | 1.09 (0.88-1.35) |                     |                     |                  |

\*Data was reported as risk ratios (95%CI) from multinomial logistic regression.

¶ Model was adjusted for demographics<sup>a</sup>, health behaviors<sup>b</sup>, baseline health conditions<sup>c</sup>, cardiac marker<sup>d</sup>, and cognition scores.

† Model was adjusted for demographics<sup>a</sup>, health behaviors<sup>b</sup>, baseline health conditions (excluding treated diabetes)<sup>c</sup>, cardiac marker<sup>d</sup>, antidepressant use and cognition scores.

‡ Model was adjusted for demographics<sup>a</sup>, health behaviors<sup>b</sup>, baseline health conditions<sup>c</sup>, cardiac (excluding treated diabetes) marker<sup>d</sup>, and cognition scores.

**Supplementary Table 2.** Risk Ratios for the Association Between Quintile of Glycated Hemoglobin (HbA<sub>1c</sub>) and Risk of Incident Depressive Symptoms During 4-year of follow-up Among Nondepressed Individuals at Baseline\*

|                     | No. cases | Crude IRRs       | Adjusted IRRs ¶  |
|---------------------|-----------|------------------|------------------|
| Quintile 1 (n=1325) | 259       | 1.00 (Reference) | 1.00 (Reference) |
| Quintile 2 (n=1080) | 246       | 1.17 (1.00-1.36) | 1.16 (1.00-1.35) |
| Quintile 3 (n=1116) | 247       | 1.13 (0.97-1.32) | 1.11 (0.96-1.30) |
| Quintile 4 (n=1174) | 309       | 1.35 (1.16-1.56) | 1.29 (1.12-1.49) |
| Quintile 5 (n=972)  | 220       | 1.16 (0.99-1.36) | 1.12 (0.95-1.33) |

\*Data was reported as incidence rate ratio (95%CI) from modified Poisson regression models with a robust error variance.

¶ Model was adjusted for demographics<sup>a</sup>, health behaviors<sup>b</sup>, baseline health conditions<sup>c</sup>, cardiac marker<sup>d</sup>, antidepressant use and cognition scores (Model 5) plus baseline CES-D scores.
